# Supplementary material for: Bone marrow histomorphological criteria can accurately diagnose hemophagocytic lymphohistiocytosis
Source: PubMed Central journal article supplement — Haematologica. 2018 Jun 14;103(10):1635–41. doi: 10.3324/haematol.2017.186627 (PMC6165820; doi:10.3324/haematol.2017.186627), 2018-10
Supplement: 2017_186627-Disclosures_and_Contributions.pdf [file 2017_186627-Disclosures_and_Contributions.pdf]

Haematologica  
HAEMATOL/2017/186627  
Version 3

Bone marrow histomorphologic criteria can accurately diagnose  
hemophagocytic lymphohistiocytosis

Eric Gars, Natasha Purington, Gregory Scott, Karen Chisholm, Dita  
Gratzinger, Beth A. Martin, and Robert S. Ohgami

Disclosures: none

Contributions: EG, GS, and RO performed research; NP performed data analysis; EG and RO conceived the study and wrote the manuscript; BM shaped research, advised on patient selection and clinicopathologic evaluation and edited the manuscript. DG advised on clinicopathologic data and edited the manuscript. KM analyzed data, shaped research, and edited the manuscript.
